# Supplementary material
Source: PubMed Central journal article supplement (PMC6135232)

Commercially available ADA

ADA  
160/80 mg

Initiate  
induction

ADA  
40 mg  
EOW

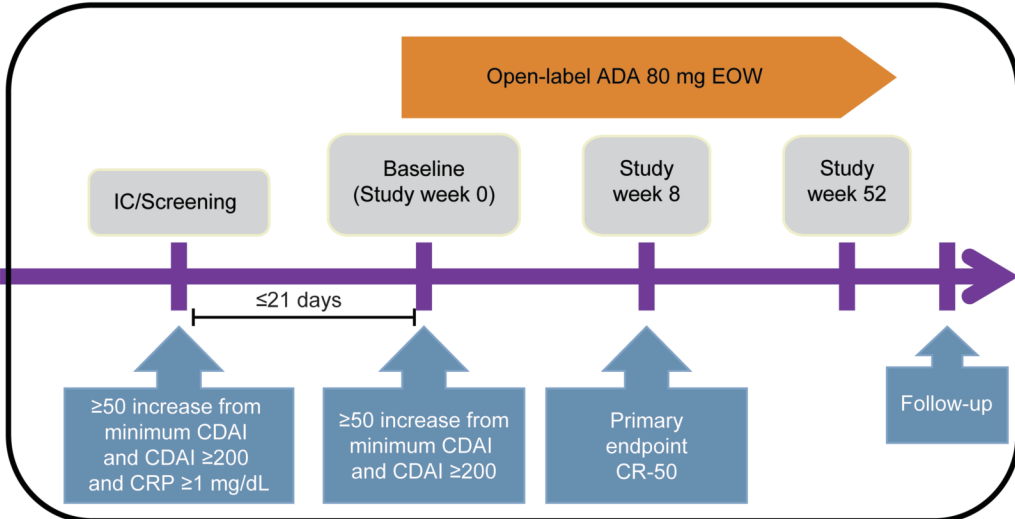

Supplement: iid-0002-0228-s01.pdf [file iid-0002-0228-s01.pdf]
